# Supplementary material for: Clinical Features and Genomic Landscape of Myeloproliferative Neoplasm (MPN) Patients with Autoimmune and Inflammatory Diseases (AID)
Source: Research Square preprint supplement (doi:10.21203/rs.3.rs-2526712/v1), 2023-02-07
Supplement: Supplementary file 1 [file 419203e4875bd532d97be7a4.docx]

**Clinical Features and Genomic Landscape of Myeloproliferative Neoplasm (MPN) Patients with Autoimmune and Inflammatory Diseases**

**Supplementary materials**

**Supplementary Figures:**

**Supplementary Figure 1**: Impact of AID association on MPN patient's outcome according to MPN subtype.

**Supplementary Tables:**

**Supplementary Table 1**: List of 36 myeloid malignancies-related genes used for targeted next-generation sequencing.

**Supplementary Table 2**: Detailed AID response criteria.

**Supplementary Table 3**: Detailed MPN characteristics stratified by AID subgroups.

**Supplementary Table 4**: Detailed AID clinical and biological features stratified by AID subgroups.

**Supplementary Table 5**: Additional somatic mutations according to MPN subgroup and presence of associated AID.

**Supplementary Table 6**: Detailed somatic mutations according to MPN subgroup and presence of associated AID.

**Supplementary Figure 1**: **Impact of AID association on MPN patient's outcome according to MPN subtype.** (**A**) Overall survival (OS), (**B**) MDS/AML transformation-free survival (TFS), (**C**) Myelofibrosis-free survival (MFS). MPN patients with AID (red lines) are compared to control MPN patients without AID (blue lines).

*Myelofibrosis-free survival analysis was performed excluding patients with primary myelofibrosis.*


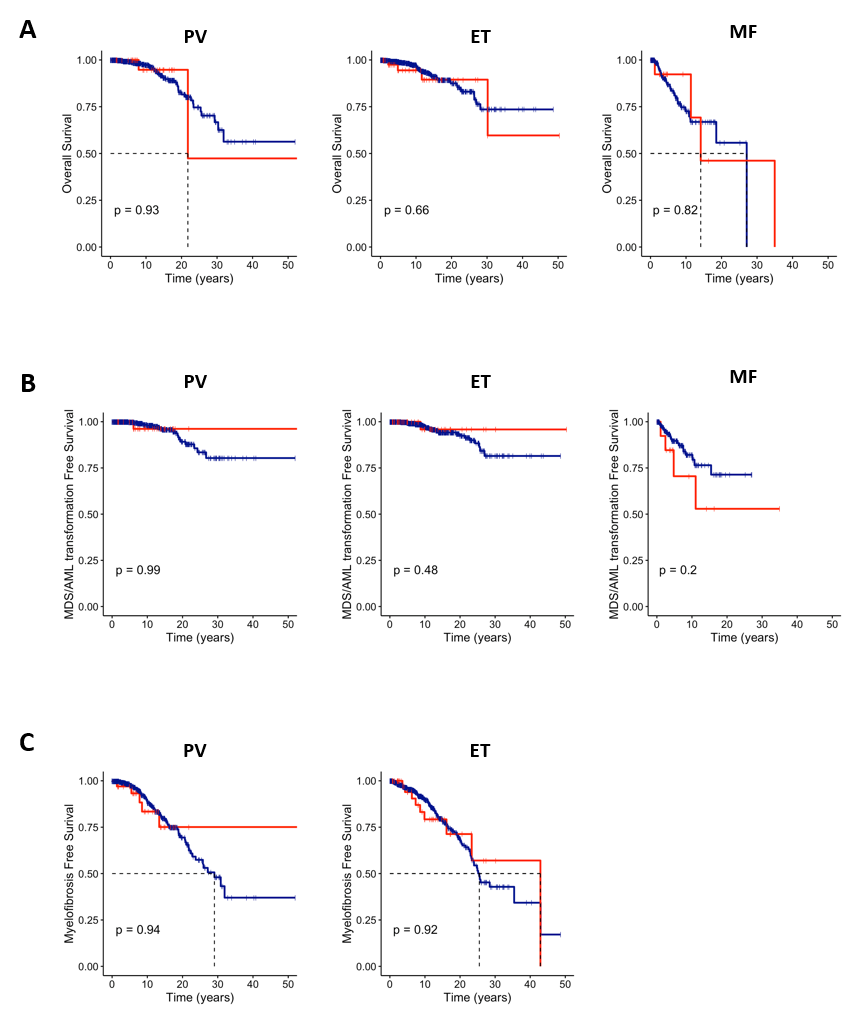


**Supplementary Table 1**: **List of 36 myeloid malignancies-related genes used for targeted next-generation sequencing.**

| **Gene** | **Reference** |
| --- | --- |
| *ABL1* | NM_005157 |
| *ASXL1* | NM_015338 |
| *BRAF* | NM_004333 |
| *CALR* | NM_004343 |
| *CBL* | NM_005188 |
| *CCND2* | NM_001759 |
| *CEBPA* | NM_004364 |
| *CSF3R* | NM_156039 |
| *CUX1* | NM_001913 |
| *DNMT3A* | NM_022552 |
| *ETNK1* | NM_018638 |
| *ETV6* | NM_001987 |
| *EZH2* | NM_004456 |
| *FLT3* | NM_004119 |
| *HRAS* | NM_005343 |
| *IDH1* | NM_005896 |
| *IDH2* | NM_002168 |
| *IKZF1* | NM_006060 |
| *JAK2* | NM_004972 |
| *KIT* | NM_000222 |
| *KRAS* | NM_033360 |
| *MPL* | NM_005373 |
| *NFE2* | NM_001261461 |
| *NPM1* | NM_002520 |
| *NRAS* | NM_002524 |
| *PTPN11* | NM_002834 |
| *RUNX1* | NM_001754 |
| *SETBP1* | NM_015559 |
| *SF3B1* | NM_012433 |
| *SH2B3* | NM_005475 |
| *SRSF2* | NM_003016 |
| *TET2* | NM_001127208 |
| *TP53* | NM_001126112 |
| *U2AF1* | NM_006758 |
| *WT1* | NM_024426 |
| *ZRSR2* | NM_005089 |

**Supplementary Table 2**: **Detailed AID response criteria.**

*AID: autoimmune and inflammatory disorder*

|  |
| --- |
| **AID response criteria** |
| Clinical response: — Complete: absence of new signs and complete disappearance of previous clinical signs  — Partial: >50% improvement of previous signs — No response: appearance of new signs and/or clinical improvement less than 50% |
| Biological response: — Complete: negativation of acute phase reactants (e.g., serum c-reactive protein) — Partial: acute phase reactants decrease >50% — No response: acute phase reactants increase and/or decrease <50% |
| Immunological response (if appropriate): — Complete: normalization of the disease-specific immunological parameters (*e.g.,* anti-dsDNA antibodies in systemic lupus erythematosus) — Partial: decrease of >50% — No response: increase and/or decrease <50% |

**Supplementary Table 3**: **Detailed MPN characteristics stratified by AID subgroups.**

*AID: autoimmune and inflammatory disease; ET: essential thrombocythemia; Hb: hemoglobin; Hte: hematocrit; PV: polycythemia vera; MDS: myelodysplastic neoplasm; MF: myelofibrosis; MPN: myeloproliferative neoplasm. The number of patients and proportion (within the total number of patients with AID, n=95) are described.*

|  | **Organe specific diseases**  **(n=41, 43%)** | **Unclassified (n=18, 19%)** | **Inflammatory arthritis**  **(n=13, 14%)** | **Connective tissue disease (n=9, 9%)** | **Dermatosis (n=8, 8%)** | **Systemic vasculitis**  **(n=6, 6%)** |
| --- | --- | --- | --- | --- | --- | --- |
| **Sex** |  |  |  |  |  |  |
| Female | 29 (70.7%) | 13 (72.2%) | 8 (61.5%) | 5 (55.6%) | 4 (50.0%) | 3 (50.0%) |
| Male | 12 (29.3%) | 5 (27.8%) | 5 (38.5%) | 4 (44.4%) | 4 (50.0%) | 3 (50.0%) |
| **Age at MPN diagnosis (median [IQR])** | 50.3 [41.3, 60.7] | 51.2 [46.6, 69.9] | 49.7 [38.9, 67.15] | 60.2 [48.8, 63.25] | 56.4 [51.8, 71] | 64.2 [61.9, 73.2] |
| **MPN subtype, nb (%)** |  |  |  |  |  |  |
| PV | 14 (34.1%) | 7 (38.9%) | 4 (30.8%) | 2 (22.2%) | 3 (37.5%) | 3 (50.0%) |
| ET | 20 (48.8%) | 9 (50.0%) | 6 (46.2%) | 4 (44.4%) | 4 (50.0%) | 2 (33.3%) |
| MF | 6 (14.6%) | 1 (5.6%) | 3 (23.1%) | 2 (22.2%) | 1 (12.5%) | 0 (0%) |
| MDS/MPN | 0 (0%) | 0 (0%) | 0 (0%) | 0 (0%) | 0 (0%) | 0 (0%) |
| MPN unclassified | 1 (2.4%) | 1 (5.6%) | 0 (0%) | 1 (11.1%) | 0 (0%) | 1 (16.7%) |
| **MPN** |  |  |  |  |  |  |
| JAK2 | 30 (73.2%) | 14 (77.8%) | 10 (76.9%) | 5 (55.6%) | 5 (62.5%) | 5 (83.3%) |
| CALR | 7 (17.1%) | 3 (16.7%) | 2 (15.4%) | 2 (22.2%) | 2 (25.0%) | 1 (16.7%) |
| MPL | 2 (4.9%) | 0 (0%) | 1 (7.7%) | 1 (11.1%) | 0 (0%) | 0 (0%) |
| Triple negative | 2 (4.9%) | 1 (5.6%) | 0 (0%) | 1 (11.1%) | 1 (12.5%) | 0 (0%) |

**Supplementary Table 4**: **Detailed AID clinical and biological features stratified by AID subgroups.**

*ACPA: anti-citrullinated protein antibodies, ANA: antinuclear antibodies, aPLs: antiphospholipid antibodies, ENA: extractable nuclear, ENT: ear, nose and throat; RF: rheumatoid factor.*

|  | **Organ specific diseases** | **Unclassified** | **Inflammatory arthritis** | **Connective tissue disease** | **Dermatosis** | **Systemic vasculitis** | **Overall** |
| --- | --- | --- | --- | --- | --- | --- | --- |
| **CLINICAL AID MANIFESTATIONS** | N=35 | N=13 | N=11 | N=8 | N=5 | N=5 | N=77/103 |
| **Cutaneous** | 1 (3%) | 2 (15%) | 3 (27%) | 6 (75%) | 5 (100%) | 1 (20%) | 18 (23%) |
| **Cardiovascular** | 0 (0%) | 11 (85%) | 0 (0%) | 3 (38%) | 0 (0%) | 2 (40%) | 16 (21%) |
| **Articular and muscular** | 1 (3%) | 1 (8%) | 8 (73%) | 2 (25%) | 0 (0%) | 3 (60%) | 15 (19%) |
| **Digestive** | 6 (17%) | 0 (0%) | 0 (0%) | 0 (0%) | 0 (0%) | 2 (40%) | 8 (10%) |
| **Eye and ENT** | 1 (3%) | 1 (8%) | 0 (0%) | 0 (0%) | 0 (0%) | 3 (60%) | 5 (6%) |
| **Constitutional symptoms** | 1 (3%) | 0 (0%) | 0 (0%) | 0 (0%) | 0 (0%) | 3 (60%) | 4 (5%) |
| **Periperal and central nervous system** | 1 (3%) | 0 (0%) | 0 (0%) | 0 (0%) | 0 (0%) | 2 (40%) | 3 (4%) |
| **Pulmonary** | 0 (0%) | 0 (0%) | 0 (0%) | 1 (13%) | 0 (0%) | 1 (20%) | 2 (3%) |
| **Kidney** | 1 (3%) | 0 (0%) | 0 (0%) | 0 (0%) | 0 (0%) | 0 (0%) | 1 (1%) |
| **BIOLOGICAL AID FEATURES** | N=22 | N=9 | N=8 | N=8 | N=1 | N=2 | N=56/103 |
| **Anti-thyroid antibodies** | 10 (45%) | 0 (0%) | 0 (0%) | 0 (0%) | 0 (0%) | 0 (0%) | 10 (18%) |
| **ANA** | 4 (18%) | 4 (44%) | 1 (13%) | 1 (13%) | 0 (0%) | 0 (0%) | 10 (18%) |
| **RF** | 0 (0%) | 1 (11%) | 4 (50%) | 1 (13%) | 0 (0%) | 0 (0%) | 6 (11%) |
| **aPLs** | 0 (0%) | 0 (0%) | 0 (0%) | 4 (50%) | 0 (0%) | 0 (0%) | 4 (7%) |
| **ACPA** | 0 (0%) | 0 (0%) | 3 (38%) | 0 (0%) | 0 (0%) | 0 (0%) | 3 (5%) |
| **ENA antibodies** | 0 (0%) | 2 (22%) | 0 (0%) | 1 (13%) | 0 (0%) | 0 (0%) | 3 (5%) |
| **HLA B27** | 0 (0%) | 0 (0%) | 2 (25%) | 0 (0%) | 0 (0%) | 0 (0%) | 2 (4%) |
| **Angiotensin converting enzyme** | 0 (0%) | 0 (0%) | 0 (0%) | 1 (13%) | 0 (0%) | 0 (0%) | 1 (2%) |

**Supplementary Table 5**: Additional somatic mutations according to MPN subgroup and presence of associated AID.

*AID: autoimmune and inflammatory disease; HMR: high molecular risk*

|  | **PV** | | | **ET** | | | **MF** | | |
| --- | --- | --- | --- | --- | --- | --- | --- | --- | --- |
|  | Without AID (N=318) | With AID (N=26) | p value | Without AID (N=435) | With AID (N=28) | p value | Without AID (N=148) | With AID (N=7) | p value |
| **Additional mutations** | 199 (62.6%) | 15 (57.7%) | 0.78 | 231 (53.1%) | 17 (60.7%) | 0.56 | 123 (83.1%) | 6 (85.7%) | 1 |
| **HMR mutations (*ASXL1, EZH2, SRSF2, IDH1/2*)** | 58 (18.2%) | 3 (11.5%) | 0.59 | 59 (13.5%) | 5 (17.9%) | 0.72 | 82 (55.4%) | 4 (57.1%) | 1 |
| **Epigenetic mutations (*TET2, IDH1/2, DNMT3A, ASXL1*)** | 130 (40.9%) | 8 (30.8%) | 0.42 | 144 (33.1%) | 11 (39.3%) | 0.64 | 61 (41.2%) | 5 (71.4%) | 0.14 |
| **Transcription factors mutations (*RUNX1, CUX1, TP53*)** | 21 (6.6%) | 3 (11.5%) | 0.58 | 29 (6.7%) | 2 (7.1%) | 1 | 14 (9.5%) | 2 (28.6%) | 0.32 |
| **Spliceosome mutation (*SRSF2, EZH2, SF3B1, U2AF1, ZRSR2*)** | 65 (20.4%) | 2 (7.7%) | 0.19 | 68 (15.6%) | 5 (17.9%) | 0.79 | 98 (66.2%) | 5 (71.4%) | 1 |
| **Signaling mutations (*CBL, NRAS, KRAS*)** | 14 (4.4%) | 2 (7.7%) | 0.34 | 27 (6.2%) | 1 (3.6%) | 1 | 19 (12.8%) | 3 (42.9%) | 0.09 |

**Supplementary Table 6**: Detailed somatic mutations according to MPN subgroup and presence of associated AID.

*AID: autoimmune and inflammatory disease*

|  |  |  |  |  |  |  |  |  |  |
| --- | --- | --- | --- | --- | --- | --- | --- | --- | --- |
|  | **PV** | | | **ET** | | | **MF** | | |
|  | **Without AID (N=318)** | **With AID (N=26)** | **p value** | **Without AID (N=435)** | **With AID (N=28)** | **p value** | **Without AID (N=148)** | **With AID (N=7)** | **p value** |
| ***JAK2*** | 307 (96.5%) | 26 (100%) | 1 | 240 (55.2%) | 15 (53.6%) | 1 | 85 (57.4%) | 4 (57.1%) | 1 |
| ***MPL*** | 0 (0%) | 0 (0%) | . | 22 (5.1%) | 1 (3.6%) | 1 | 13 (8.8%) | 2 (28.6%) | 0.138 |
| ***TET2*** | 79 (24.8%) | 5 (19.2%) | 0.687 | 81 (18.6%) | 9 (32.1%) | 0.132 | 41 (27.7%) | 5 (71.4%) | **0.025** |
| ***ASXL1*** | 40 (12.6%) | 2 (7.7%) | 0.754 | 44 (10.1%) | 3 (10.7%) | 0.756 | 71 (48.0%) | 3 (42.9%) | 1 |
| ***EZH2*** | 14 (4.4%) | 1 (3.8%) | 1 | 14 (3.2%) | 1 (3.6%) | 0.614 | 15 (10.1%) | 0 (0%) | 1 |
| ***IDH1*** | 2 (0.6%) | 0 (0%) | 1 | 4 (0.9%) | 1 (3.6%) | 0.269 | 2 (1.4%) | 1 (14.3%) | 0.13 |
| ***IDH2*** | 6 (1.9%) | 1 (3.8%) | 0.426 | 7 (1.6%) | 0 (0%) | 1 | 4 (2.7%) | 1 (14.3%) | 0.209 |
| ***CSF3R*** | 1 (0.3%) | 0 (0%) | 1 | 1 (0.2%) | 0 (0%) | 1 | 2 (1.4%) | 0 (0%) | 1 |
| ***SRSF2*** | 2 (0.6%) | 0 (0%) | 1 | 4 (0.9%) | 0 (0%) | 1 | 7 (4.7%) | 2 (28.6%) | 0.054 |
| ***CALR*** | 2 (0.6%) | 0 (0%) | 1 | 105 (24.1%) | 8 (28.6%) | 0.762 | 39 (26.4%) | 1 (14.3%) | 0.678 |
| ***DNMT3A*** | 69 (21.7%) | 3 (11.5%) | 9.339 | 71 (16.3%) | 4 (14.3%) | 1 | 23 (15.5%) | 1 (14.3%) | 1 |
| ***SH2B3*** | 17 (5.3%) | 2 (7.7%) | 0.645 | 23 (5.3%) | 3 (10.7%) | 0.202 | 10 (6.8%) | 1 (14.3%) | 0.409 |
| ***NRAS*** | 3 (0.9%) | 1 (3.8%) | 0.271 | 3 (0.7%) | 0 (0%) | 1 | 6 (4.1%) | 0 (0%) | 1 |
| ***NFE2*** | 24 (7.5%) | 3 (11.5%) | 0.444 | 16 (3.7%) | 0 (0%) | 0.614 | 6 (4.1%) | 1 (14.3%) | 0.281 |
| ***TP53*** | 16 (5.0%) | 1 (3.8%) | 1 | 21 (4.8%) | 2 (7.1%) | 0.642 | 10 (6.8%) | 0 (0%) | 1 |
| ***KRAS*** | 4 (1.3%) | 0 (0%) | 1 | 2 (0.5%) | 0 (0%) | 1 | 3 (2.0%) | 1 (14.3%) | 0.17 |
| ***SETBP1*** | 0 (0%) | 0 (0%) | . | 0 (0%) | 0 (0%) | . | 4 (2.7%) | 0 (0%) | 1 |
| ***U2AF1*** | 3 (0.9%) | 0 (0%) | 1 | 8 (1.8%) | 2 (7.1%) | 0.117 | 19 (12.8%) | 0 (0%) | 0.598 |
| ***CBL*** | 7 (2.2%) | 1 (3.8%) | 0.47 | 24 (5.5%) | 1 (3.6%) | 1 | 12 (8.1%) | 2 (28.6%) | 0.123 |
| ***IKZF1*** | 1 (0.3%) | 0 (0%) | 1 | 0 (0%) | 0 (0%) | . | 0 (0%) | 0 (0%) | . |
| **SF3B1** | 11 (3.5%) | 1 (3.8%) | 1 | 11 (2.5%) | 0 (0%) | 1 | 11 (7.4%) | 2 (28.6%) | 0.107 |
| **CEBPa** | 0 (0%) | 0 (0%) | . | 1 (0.2%) | 0 (0%) | 1 | 0 (0%) | 0 (0%) | . |
| **CUX1** | 6 (1.9%) | 2 (7.7%) | 0.116 | 8 (1.8%) | 0 (0%) | 1 | 4 (2.7%) | 1 (14.3%) | 0.209 |
| **ZRSR2** | 3 (0.9%) | 0 (0%) | 1 | 3 (0.7%) | 0 (0%) | 1 | 7 (4.7%) | 0 (0%) | 1 |
| **KIT** | 0 (0%) | 0 (0%) | . | 0 (0%) | 0 (0%) | . | 0 (0%) | 0 (0%) | . |
| **BRAF** | 1 (0.3%) | 0 (0%) | 1 | 2 (0.5%) | 0 (0%) | 1 | 0 (0%) | 0 (0%) | . |
| **FLT3** | 0 (0%) | 0 (0%) | . | 1 (0.2%) | 0 (0%) | 1 | 0 (0%) | 0 (0%) | . |
| **ABL1** | 0 (0%) | 0 (0%) | . | 0 (0%) | 0 (0%) | . | 0 (0%) | 0 (0%) | . |
| **HRAS** | 0 (0%) | 0 (0%) | . | 0 (0%) | 0 (0%) | . | 0 (0%) | 0 (0%) | . |
| **NPM1** | 0 (0%) | 0 (0%) | . | 0 (0%) | 0 (0%) | . | 0 (0%) | 0 (0%) | . |
| **PTPN11** | 1 (0.3%) | 0 (0%) | 1 | 2 (0.5%) | 0 (0%) | 1 | 2 (1.4%) | 0 (0%) | 1 |
| **RUNX1** | 1 (0.3%) | 0 (0%) | 1 | 2 (0.5%) | 0 (0%) | 1 | 3 (2.0%) | 1 (14.3%) | 0.17 |
| **ETV6** | 2 (0.6%) | 1 (3.8%) | 0.211 | 4 (0.9%) | 0 (0%) | 1 | 1 (0.7%) | 0 (0%) | 1 |
| **WT1** | 0 (0%) | 0 (0%) | . | 0 (0%) | 0 (0%) | . | 0 (0%) | 0 (0%) | . |
| **ETNK1** | 0 (0%) | 0 (0%) | . | 0 (0%) | 0 (0%) | . | 0 (0%) | 0 (0%) | . |
| **CCND2** | 1 (0.3%) | 0 (0%) | 1 | 1 (0.2%) | 0 (0%) | 1 | 0 (0%) | 1 (14.3%) | **.** |
